# Supplementary material for: Atmospheric Torques and Earth's Rotation: What Drove theMillisecond-Level Length-of-Day Response to the 2015–16 El Niño?
Source: Copernicus journal article supplement (doi:10.5194/esd-2017-52), 2017-07-18
Supplement: Supplementary file [file esd-2017-52-AC2-supplement.pdf]

# Supplementary Material

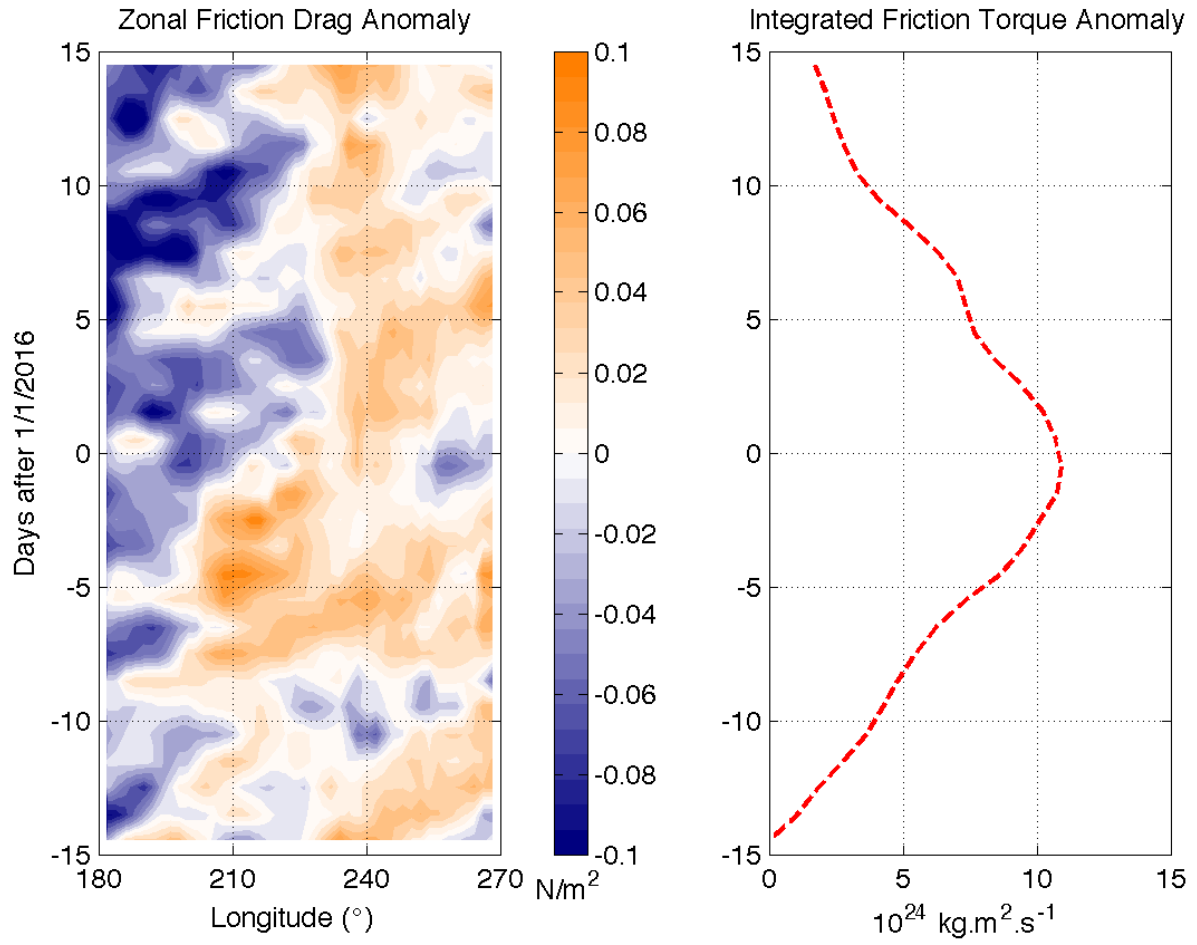

5 **Figure S1:** Left: Time-longitude (Hovmoeller) diagram of the zonal friction drag anomaly between 15 December 2015 and 15 January 2016 and averaged over latitudes between 60°S and 60°N. Right: Reproduction of the integrated friction torque arising from the Eastern Pacific zone as shown by the red, dashed line in the bottom panel of Fig. 4.
